# Supplementary material for: Cell types of origin of the cell-free transcriptome
Source: PubMed Central journal article supplement (PMC9200634; doi:10.1038/s41587-021-01188-9), 2022-02-07
Supplement: 41587_2021_1188_MOESM1_ESM.pdf [file 41587_2021_1188_MOESM1_ESM.pdf]

**Supplementary information**

---

**Cell types of origin of the cell-free transcriptome**

---

In the format provided by the authors and unedited

**Supplementary Information for Vorperian et al. ‘Cell types of origin of the cell free transcriptome’**

**Table of Contents**

Supplementary Figure 1.....2-7  
Supplementary Note 1.....8  
Supplementary Note 2.....9  
The Tabula Sapiens Consortium Author List.....10-12  
References.....13



C

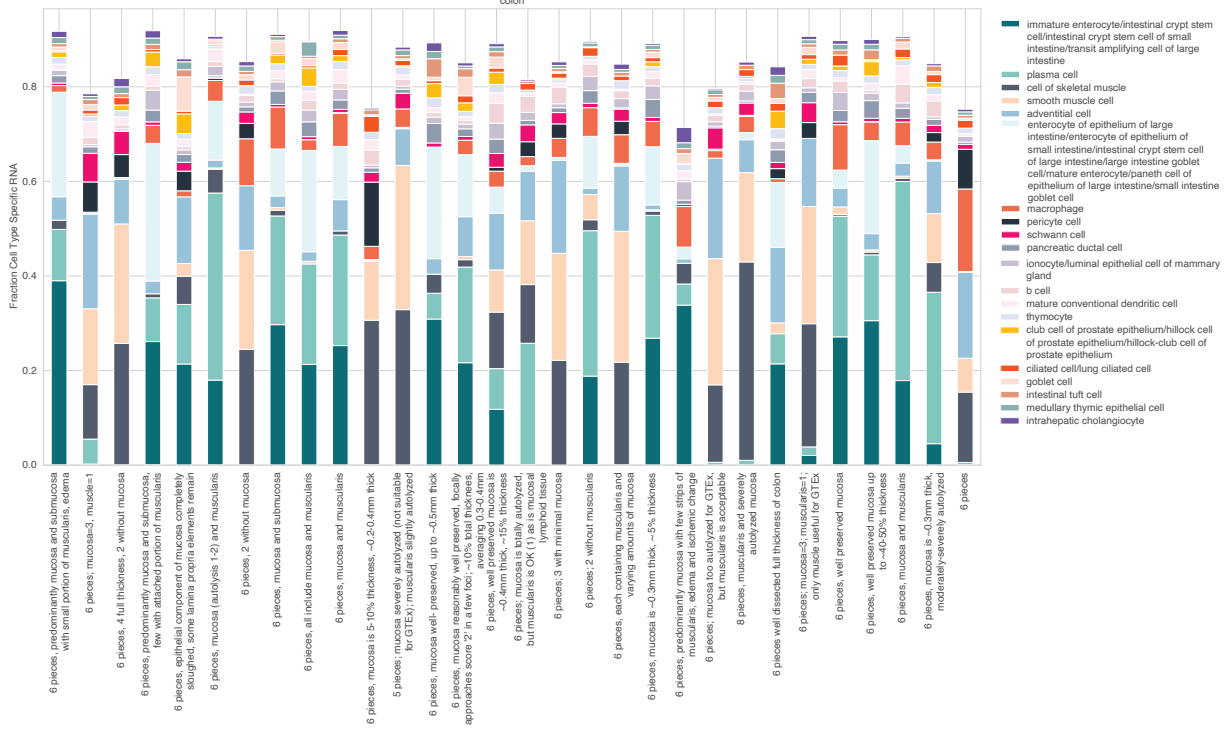

D

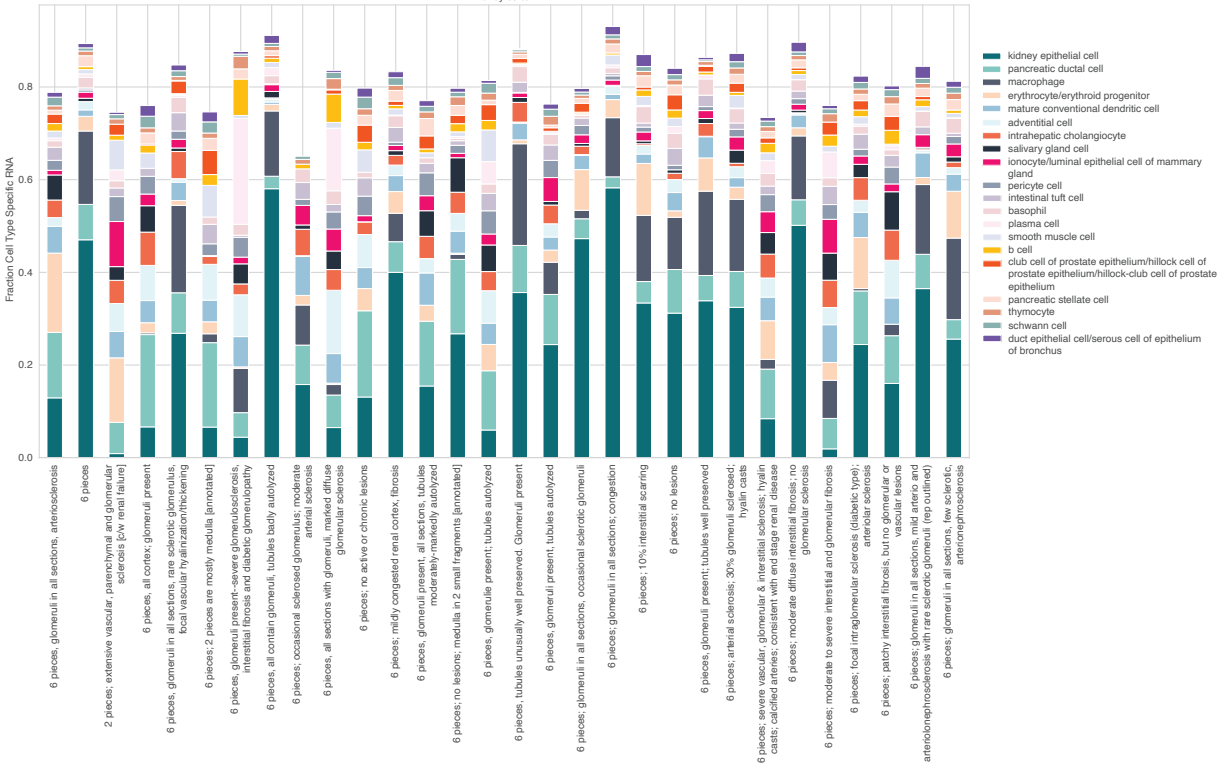

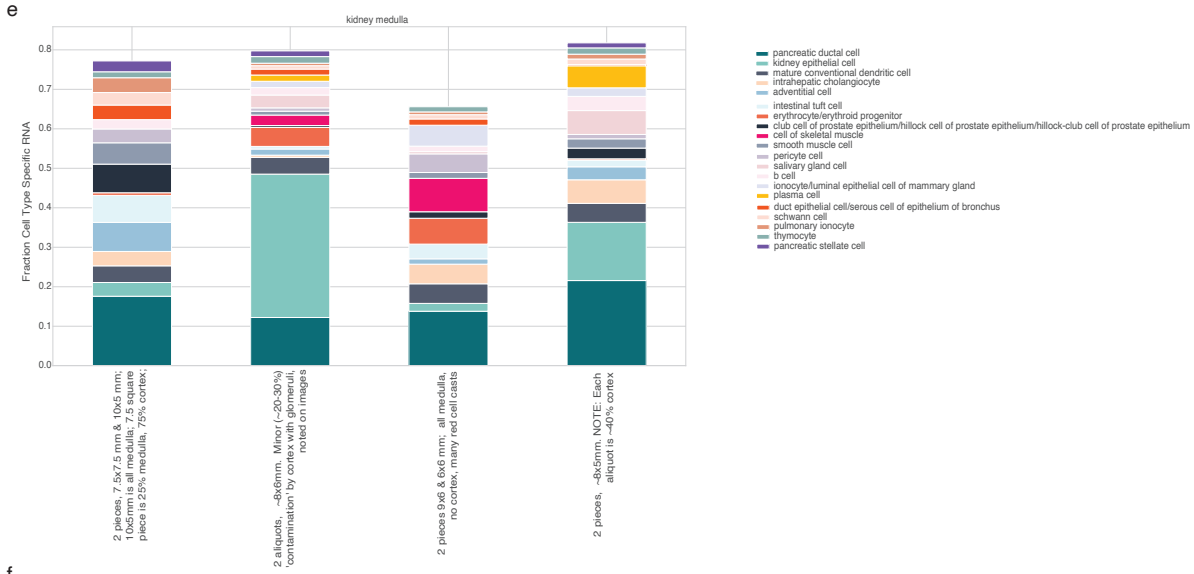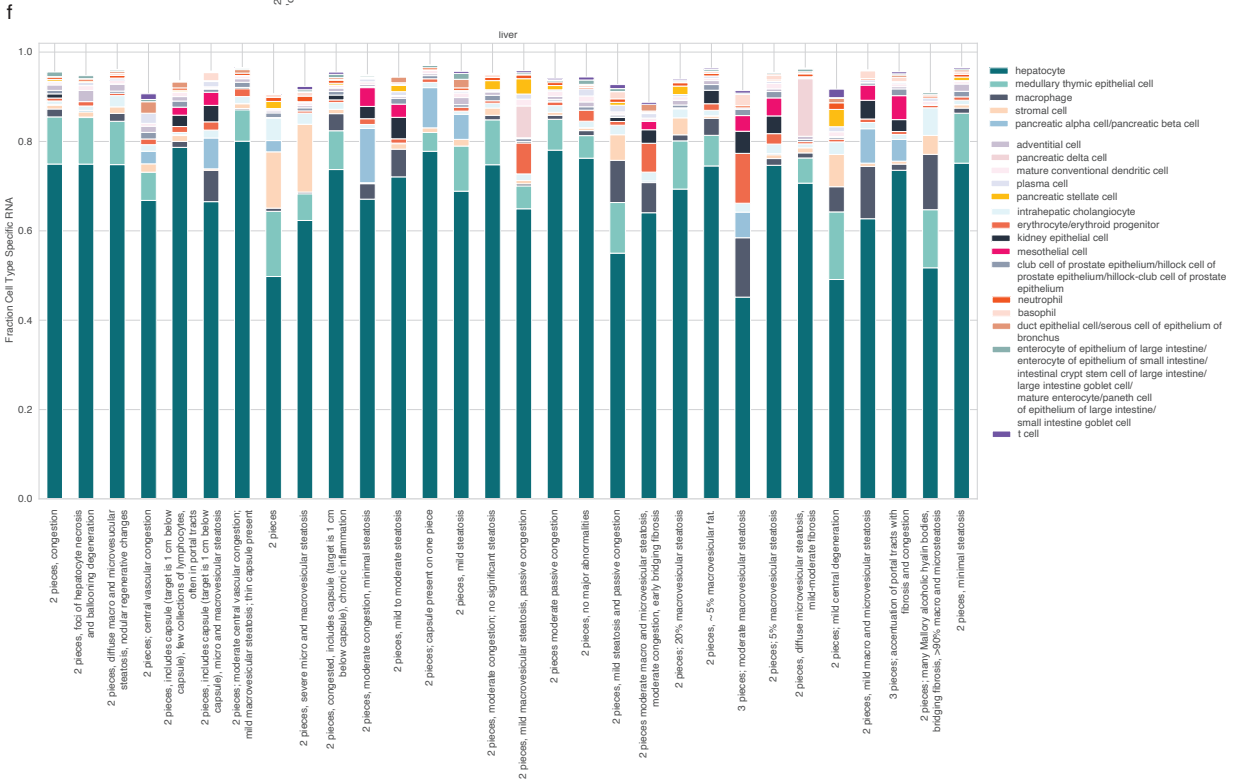

g

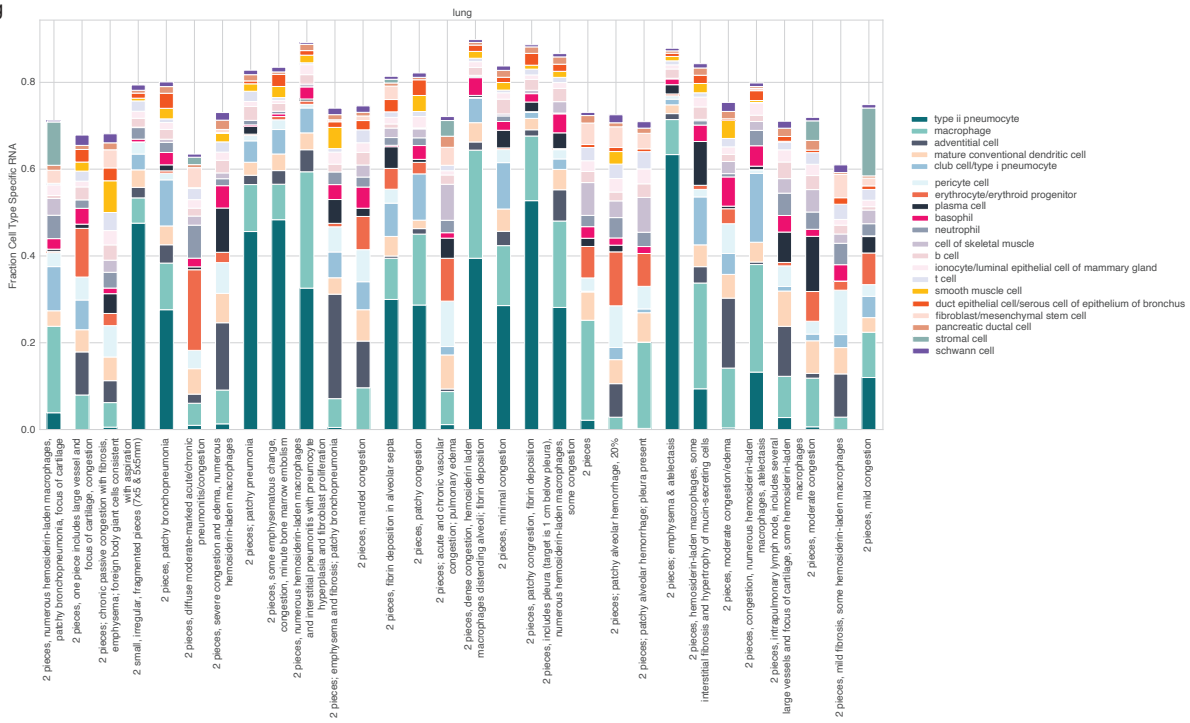

h

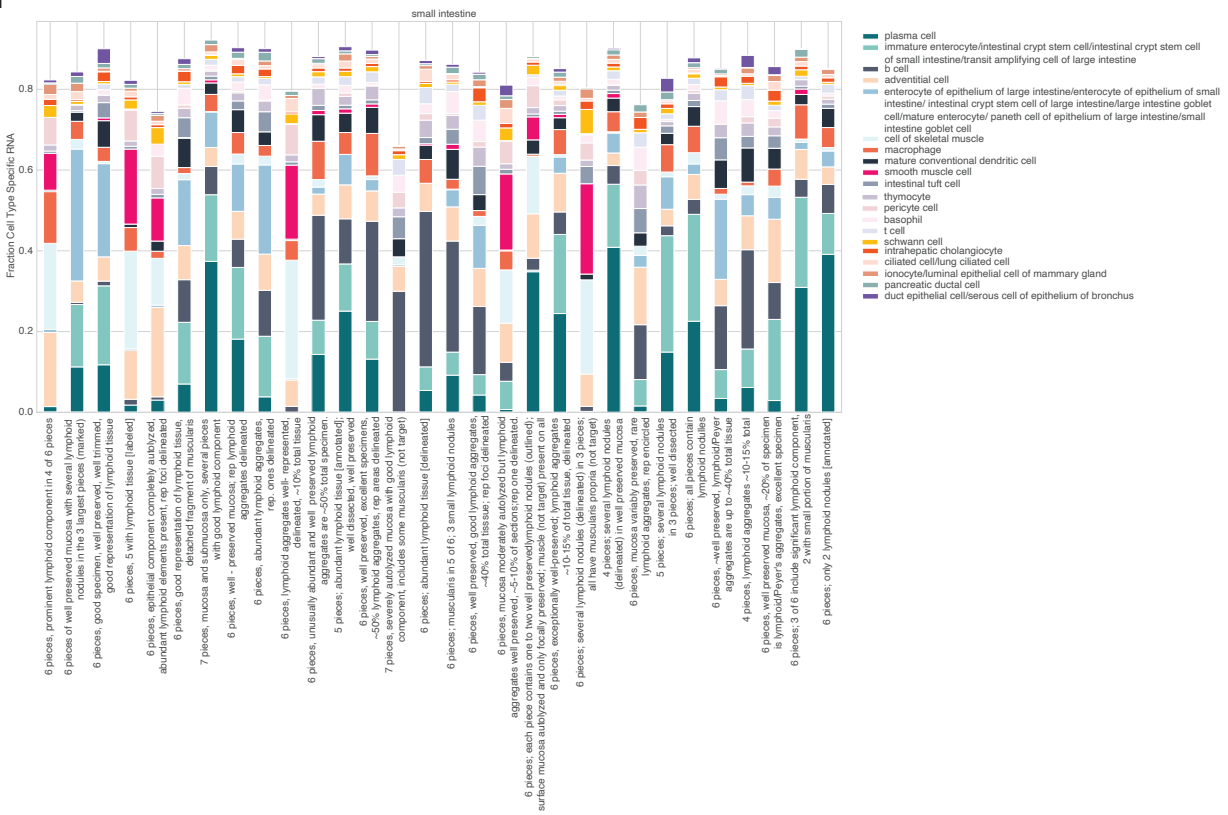



**Supplementary Figure 1: Deconvolved fractions of cell type specific RNA from various GTEx tissues using nu-SVR and the *Tabula Sapiens* basis matrix.**

Top 20 largest fractional contributions of cell type specific RNA for a given tissue. The two tissues whose cell types were absent from the basis matrix column space were Kidney – Medulla and Brain. Kidney medulla samples reported to be contaminated with cortex are reflected by deconvolved kidney epithelia fractions. The brain, which is absent from the TSP v1.0, yields majority fractions of schwann cell-specific RNA, a peripheral nervous cell type. Majority cell types for a given tissue, such as lung pneumonocytes and immune cells in the lung or kidney epithelia for the kidney cortex underscore the ability for the basis matrix to capture representative fractions of cell type specific RNA and reflect underlying cell heterogeneity in bulk RNA-seq data. Additional discussion is in Supplementary Note 1.

- (a) Bladder
- (b) Brain
- (c) Colon – Transverse
- (d) Kidney – Cortex
- (e) Kidney – Medulla
- (f) Liver
- (g) Lung
- (h) Small Intestine – Terminal Ileum
- (i) Spleen
- (j) Whole Blood



**Supplementary Note 1: Deconvolution of bulk GTEx tissues using the *Tabula Sapiens*-derived basis matrix**

To assess the ability of the basis matrix to deconvolve tissues whose cell types were wholly present in the cell type column space, we deconvolved a subset of bulk RNA-seq GTEx samples. The determined fractions of cell type specific RNA recapitulated the predominant cell types within a given tissue (Supplementary Information Fig. 1). Organs with increased cell type heterogeneity (lung, bladder, kidney, intestine, colon) in contrast to tissues with reduced spatial heterogeneity (liver, spleen, whole blood)<sup>1</sup>, exhibited greater variance in deconvolved fractions (Supplementary Information Fig. 1) and deconvolution performance (Extended Data Fig. 3). Tissues with reduced spatial heterogeneity whose cell types were wholly in the basis matrix column space include predominantly b cells/plasma cells and erythrocytes in spleen; hepatocytes, liver; erythrocytes and leukocytes, whole blood. Cell types belonging to tissues with increased spatial heterogeneity exhibited greater variance in deconvolved fractions: kidney cortex majority fractions were from kidney epithelia and lymphocytes; small intestine, intestinal enterocytes and lymphocytes; lung, pneumonocytes and immune cells, colon, intestinal enterocytes, lymphocytes, and muscle cells. Cells with larger volume yielded larger deconvolved fractions across all tissues. Variance in the relative cell type fractional contributions across the deconvolved bulk samples within a given tissue reflects the underlying cell type heterogeneity, particularly in these complex samples. GTEx kidney medulla samples recorded to be contaminated with renal cortex reflect the presence of the kidney epithelia, the majority cell type in the renal cortex. Given that the kidney medulla is not part of TSP v1.0, we did not expect high deconvolution performance since its cell types are absent from the basis matrix column space. The brain, whose cell types were wholly absent from the cell type column space exhibited poor deconvolution performance, as expected. However, the majority cell type fraction assigned was to the cell type belonging to the peripheral nervous system that was present in *Tabula Sapiens* version 1, the schwann cell, underscoring the ability of our deconvolution method to assign fractional contributions to similar cell types from those that are absent from the basis matrix column space.

## Supplementary Note 2: Noninvasive measurement of trophoblast cell type signatures in preeclampsia

In pregnancy, extravillous trophoblast (EVT) invasion is a stage in uteroplacental arterial remodeling<sup>2,3</sup>. Arterial remodeling occurs to ensure adequate maternal blood flow to the growing fetus<sup>2,3</sup> and is sometimes reduced in preeclampsia<sup>2</sup>. Previously, the EVT was reported by Tsang et al to be noninvasively resolvable and elevated in early onset preeclampsia (gestational age at diagnosis < 34 weeks) as compared to healthy pregnancy<sup>4</sup>. However, examination of the trophoblast gene profiles used by Tsang et al. using two independent placental single-cell atlases<sup>3,5</sup> revealed several genes that were not cell type specific or exhibited very low trophoblast expression (Extended Data Fig. 9c, d), thereby adversely impacting signature score interpretation.

*CERCAM*, *IL18BP*, and *PYCR1* are not extravillous trophoblast specific, exhibiting higher expression in fibroblast cell types in both atlases, despite Tsang's inclusion in their EVT gene profile (Extended Data Fig. 9c, d). Furthermore, EVT genes in Tsang's gene profile, *RRAD*, *SLC6A2*, and *UPK1B* all exhibit very low EVT expression across both placental atlases. Numerous PSG genes (*PSG11*, *PSG1/PSG2*, *PSG3*, *PSG4*, *PSG6*, *PSG9*) do not exhibit high syncytiotrophoblast (SCT) expression, despite their inclusion in Tsang's SCT gene profile. *GH2* either exhibits no expression or comparable non-SCT specific expression across cell types in both atlases (Extended Data Fig. 9c, d).

The presence of these non-cell type specific genes in a cell type gene profile consequently impacted the interpretation of Tsang et al's signature scores. Using our criteria for deriving a given cell type gene profile (Methods), we derived gene profiles for the same two cell types, EVT and SCT (Extended Data Fig. 8), and then quantified their respective signature scores in two previously published preeclampsia cohorts<sup>6</sup> (Extended Data Fig. 9a, b). In contrast to Tsang et al, we observed no significant difference in either trophoblast signature score in cfRNA samples collected at diagnosis for mothers with early-onset preeclampsia ( $p = 0.703$  and  $U = 1524$ ,  $0.794$  and  $U = 1504$  respectively, two-sided Mann Whitney U) (Extended Data Fig. 9a) and for mothers with either early- or late-onset preeclampsia ( $p = 0.24$  and  $H = 4.18$ ,  $0.54$  and  $H = 2.15$  respectively, Kruskal Wallace) (Extended Data Fig. 9b), as compared to samples from mothers with no complications at a matched gestational age.

In our work deriving cell type gene profiles for signature scoring in cfRNA, we only considered genes with high log fold change in a given cell type population and low expression in any other measured cell type (Methods). We acknowledge that this method may miss some genes for a given cell type population with low uniform expression (i.e. low expression in a large fraction of cells of a given type) or with heterogeneous expression (i.e. high expression in a small fraction of cells of a given type). However, since this work is the first comprehensive examination of cell type specific origins in the cell free transcriptome, we sought to be conservative in what we asserted to be cell type specific so that we could be confident in measuring a cell type signature score noninvasively; this approach boded well for all diseases presented in our work.

Taken together with validation in two independent placental cell atlases, we conclude that the EVT and SCT cell type gene profiles by Tsang et al. do not enable estimation of trophoblast pathology from cfRNA in preeclampsia. The role of extravillous trophoblast invasion and the ubiquity of its cellular pathophysiology in preeclampsia thus remains an open question.

## The Tabula Sapiens Consortium Author List

### Overall Project Direction and Coordination

Robert C. Jones<sup>1</sup>, Jim Karkanias<sup>2</sup>, Mark Krasnow<sup>3,4</sup>, Angela Oliveira Pisco<sup>2</sup>, Stephen R. Quake<sup>1,2,5</sup>, Julia Salzman<sup>3,6</sup>, Nir Yosef<sup>2,7,8,9</sup>

### Donor Recruitment

Bryan Bulthaup<sup>10</sup>, Phillip Brown<sup>10</sup>, William Harper<sup>10</sup>, Marisa Hemenez<sup>10</sup>, Ravikumar Ponnusamy<sup>10</sup>, Ahmad Salehi<sup>10</sup>, Bhavani A. Sanagavarapu<sup>10</sup>, Eileen Spallino<sup>10</sup>

### Surgeons

Ksenia A. Aaron<sup>11</sup>, Waldo Concepcion<sup>10</sup>, James M. Gardner<sup>12,13</sup>, Burnett Kelly<sup>10,14</sup>, Nikole Neidlinger<sup>10</sup>, Zifa Wang<sup>10</sup>

### Logistical coordination

Sheela Crasta<sup>1,2</sup>, Saroja Kolluru<sup>1,2</sup>, Maurizio Morri<sup>2</sup>, Angela Oliveira Pisco<sup>2</sup>, Serena Y. Tan<sup>15</sup>, Kyle J. Travaglini<sup>3</sup>, Chenling Xu<sup>7</sup>

### Organ Processing

Marcela Alcántara-Hernández<sup>16</sup>, Nicole Almanzar<sup>17</sup>, Jane Antony<sup>18</sup>, Benjamin Beyersdorf<sup>19</sup>, Deviana Burhan<sup>20</sup>, Kruti Calcuttawala<sup>21</sup>, Matthew M. Carter<sup>16</sup>, Charles K. F. Chan<sup>18,22</sup>, Charles A. Chang<sup>23</sup>, Stephen Chang<sup>3,19</sup>, Alex Colville<sup>21,24</sup>, Sheela Crasta<sup>1,2</sup>, Rebecca N. Culver<sup>25</sup>, Ivana Cvijović<sup>1,5</sup>, Gaetano D'Amato<sup>26</sup>, Camille Ezran<sup>3</sup>, Francisco X. Galdos<sup>18</sup>, Astrid Gillich<sup>3</sup>, William R. Goodyer<sup>27</sup>, Yan Hang<sup>23,28</sup>, Alyssa Hayashi<sup>1</sup>, Sahar Houshdaran<sup>29</sup>, Xianxi Huang<sup>19,30</sup>, Juan C. Irwin<sup>29</sup>, SoRi Jang<sup>3</sup>, Julia Vallve Juanico<sup>29</sup>, Aaron M. Kershner<sup>18</sup>, Soochi Kim<sup>21,24</sup>, Bernhard Kiss<sup>18</sup>, Saroja Kolluru<sup>1,2</sup>, William Kong<sup>18</sup>, Maya E. Kumar<sup>17</sup>, Angera H. Kuo<sup>18</sup>, Rebecca Leylek<sup>16</sup>, Baoxiang Li<sup>31</sup>, Gabriel B. Loeb<sup>32</sup>, Wan-Jin Lu<sup>18</sup>, Sruthi Mantri<sup>33</sup>, Maxim Markovic<sup>1</sup>, Patrick L. McAlpine<sup>11,34</sup>, Antoine de Morree<sup>21,24</sup>, Maurizio Morri<sup>2</sup>, Karim Mrouj<sup>18</sup>, Shravani Mukherjee<sup>31</sup>, Tyler Muser<sup>17</sup>, Patrick Neuhöfer<sup>3,35,36</sup>, Thi D. Nguyen<sup>37</sup>, Kimberly Perez<sup>16</sup>, Ragini Phansalkar<sup>26</sup>, Angela Oliveira Pisco<sup>2</sup>, Nazan Puluca<sup>18</sup>, Zhen Qi<sup>18</sup>, Poorvi Rao<sup>20</sup>, Hayley Raquer-McKay<sup>16</sup>, Nicholas Schaum<sup>18,21</sup>, Bronwyn Scott<sup>31</sup>, Bobak Seddighzadeh<sup>38</sup>, Joe Segal<sup>20</sup>, Sushmita Sen<sup>29</sup>, Shaheen Sikandar<sup>18</sup>, Sean P. Spencer<sup>16</sup>, Lea Steffes<sup>17</sup>, Varun R. Subramaniam<sup>31</sup>, Aditi Swarup<sup>31</sup>, Michael Swift<sup>1</sup>, Kyle J. Travaglini<sup>3</sup>, Will Van Treuren<sup>16</sup>, Emily Trimm<sup>26</sup>, Stefan Veizades<sup>19,39</sup>, Sivakamasundari Vijayakumar<sup>18</sup>, Kim Chi Vo<sup>29</sup>, Sevahn K. Vorperian<sup>1,40</sup>, Wanxin Wang<sup>29</sup>, Hannah N.W. Weinstein<sup>38</sup>, Juliane Winkler<sup>41</sup>, Timothy T.H. Wu<sup>3</sup>, Jamie Xie<sup>38</sup>, Andrea R. Yung<sup>3</sup>, Yue Zhang<sup>3</sup>

### Sequencing

Angela M. Detweiler<sup>2</sup>, Honey Mekonen<sup>2</sup>, Norma F. Neff<sup>2</sup>, Rene V. Sit<sup>2</sup>, Michelle Tan<sup>2</sup>, Jia Yan<sup>2</sup>

### Histology

Gregory R. Bean<sup>15</sup>, Vivek Charu<sup>15</sup>, Erna Forgó<sup>15</sup>, Brock A. Martin<sup>15</sup>, Michael G. Ozawa<sup>15</sup>, Oscar Silva<sup>15</sup>, Serena Y. Tan<sup>15</sup>, Angus Toland<sup>15</sup>, Venkata N.P. Vemuri<sup>2</sup>

### Data Analysis

Shaked Afik<sup>7</sup>, Kyle Awayan<sup>2</sup>, Olga Borisovna Botvinnik<sup>2</sup>, Ashley Byrne<sup>2</sup>, Michelle Chen<sup>1</sup>, Roozbeh Dehghanasiri<sup>3,6</sup>, Angela M. Detweiler<sup>2</sup>, Adam Gayoso<sup>7</sup>, Alejandro A. Granados<sup>2</sup>, Qiqing Li<sup>2</sup>, Gita Mahmoudabadi<sup>1</sup>, Aaron McGeever<sup>2</sup>, Antoine de Morree<sup>21,24</sup>, Julia Eve Olivieri<sup>3,6,42</sup>, Madeline Park<sup>2</sup>, Angela Oliveira Pisco<sup>2</sup>, Neha Ravikumar<sup>1</sup>, Julia Salzman<sup>3,6</sup>, Geoff Stanley<sup>1</sup>, Michael Swift<sup>1</sup>, Michelle Tan<sup>2</sup>, Weilun Tan<sup>2</sup>, Alexander J Tarashansky<sup>2</sup>, Rohan Vanheusden<sup>2</sup>, Sevahn K. Vorperian<sup>1,40</sup>, Peter Wang<sup>3,6</sup>, Sheng Wang<sup>2</sup>, Galen Xing<sup>2</sup>, Chenling Xu<sup>6</sup>, Nir Yosef<sup>2,6,7,8</sup>

### Expert Cell Type Annotation

Marcela Alcántara-Hernández<sup>16</sup>, Jane Antony<sup>18</sup>, Charles K. F. Chan<sup>18,22</sup>, Charles A. Chang<sup>23</sup>, Alex Colville<sup>21,24</sup>, Sheela Crasta<sup>1,2</sup>, Rebecca Culver<sup>25</sup>, Les Dethlefsen<sup>43</sup>, Camille Ezran<sup>3</sup>, Astrid Gillich<sup>3</sup>, Yan Hang<sup>23,28</sup>, Po-Yi Ho<sup>16</sup>, Juan C. Irwin<sup>29</sup>, SoRi Jang<sup>3</sup>, Aaron M. Kershner<sup>18</sup>, William Kong<sup>18</sup>, Maya E Kumar<sup>17</sup>, Angera H. Kuo<sup>18</sup>, Rebecca Leylek<sup>16</sup>, Shixuan Liu<sup>3,44</sup>, Gabriel B. Loeb<sup>32</sup>, Wan-Jin Lu<sup>18</sup>, Jonathan S Maltzman<sup>45,46</sup>, Ross J. Metzger<sup>27,47</sup>, Antoine de Morree<sup>21,24</sup>, Patrick Neuhöfer<sup>3,35,36</sup>, Kimberly Perez<sup>16</sup>, Ragini Phansalkar<sup>26</sup>, Zhen Qi<sup>18</sup>, Poorvi Rao<sup>20</sup>, Hayley Raquer-McKay<sup>16</sup>, Koki Sasagawa<sup>19</sup>, Bronwyn Scott<sup>31</sup>, Rahul Sinha<sup>15,18,35</sup>, Hanbing Song<sup>38</sup>, Sean P. Spencer<sup>16</sup>, Aditi Swarup<sup>31</sup>, Michael Swift<sup>1</sup>, Kyle J. Travaglini<sup>3</sup>, Emily Trimm<sup>26</sup>, Stefan Veizades<sup>19,39</sup>, Sivakamasundari Vijayakumar<sup>18</sup>, Bruce Wang<sup>20</sup>, Wanxin Wang<sup>29</sup>, Juliane Winkler<sup>41</sup>, Jamie Xie<sup>38</sup>, Andrea R. Yung<sup>3</sup>

### Tissue Expert Principal Investigators

Steven E. Artandi<sup>3,35,36</sup>, Philip A. Beachy<sup>18,23,48</sup>, Michael F. Clarke<sup>18</sup>, Linda C. Giudice<sup>29</sup>, Franklin W. Huang<sup>38,49</sup>, Kerwyn Casey Huang<sup>1,16</sup>, Juliana Idoyaga<sup>16</sup>, Seung K Kim<sup>23,28</sup>, Mark Krasnow<sup>3,4</sup>, Christin S. Kuo<sup>17</sup>, Patricia Nguyen<sup>19,39,46</sup>, Stephen R. Quake<sup>1,2,5</sup>, Thomas A. Rando<sup>21,24</sup>, Kristy Red-Horse<sup>26</sup>, Jeremy Reiter<sup>50</sup>, David A. Relman<sup>16,43,46</sup>, Justin L. Sonnenburg<sup>16</sup>, Bruce Wang<sup>20</sup>, Albert Wu<sup>31</sup>, Sean M. Wu<sup>19,39</sup>, Tony Wyss-Coray<sup>21,24</sup>

### Affiliations

<sup>1</sup>Department of Bioengineering, Stanford University; Stanford, CA, USA.

<sup>2</sup>Chan Zuckerberg Biohub; San Francisco, CA, USA.

<sup>3</sup>Department of Biochemistry, Stanford University School of Medicine; Stanford, CA, USA.

<sup>4</sup>Howard Hughes Medical Institute; USA.

<sup>5</sup>Department of Applied Physics, Stanford University; Stanford, CA, USA.

<sup>6</sup>Department of Biomedical Data Science, Stanford University; Stanford, CA, USA.

<sup>7</sup>Center for Computational Biology, University of California Berkeley; Berkeley, CA, USA.

<sup>8</sup>Department of Electrical Engineering and Computer Sciences, University of California Berkeley; Berkeley, CA, USA.

<sup>9</sup>Ragon Institute of MGH, MIT and Harvard; Cambridge, MA, USA.

<sup>10</sup>Donor Network West; San Ramon, CA, USA.

<sup>11</sup>Department of Otolaryngology-Head and Neck Surgery, Stanford University School of Medicine; Stanford, California, USA.

<sup>12</sup>Department of Surgery, University of California San Francisco; San Francisco, CA, USA.

<sup>13</sup>Diabetes Center, University of California San Francisco; San Francisco, CA, USA.

<sup>14</sup>DCI Donor Services; Sacramento, CA, USA.

<sup>15</sup>Department of Pathology, Stanford University School of Medicine; Stanford, CA, USA.

<sup>16</sup>Department of Microbiology and Immunology, Stanford University School of Medicine; Stanford, CA, USA.

<sup>17</sup>Department of Pediatrics, Division of Pulmonary Medicine, Stanford University; Stanford, CA, USA.

<sup>18</sup>Institute for Stem Cell Biology and Regenerative Medicine, Stanford University School of Medicine; Stanford, CA, USA.

<sup>19</sup>Department of Medicine, Division of Cardiovascular Medicine, Stanford University; Stanford, CA, USA.

<sup>20</sup>Department of Medicine and Liver Center, University of California San Francisco; San Francisco, CA, USA.

<sup>21</sup>Department of Neurology and Neurological Sciences, Stanford University School of Medicine; Stanford, CA, USA.

<sup>22</sup>Department of Surgery - Plastic and Reconstructive Surgery, Stanford University School of Medicine; Stanford, CA, USA.

<sup>23</sup>Department of Developmental Biology, Stanford University School of Medicine, Stanford, CA, USA

<sup>24</sup>Paul F. Glenn Center for the Biology of Aging, Stanford University School of Medicine; Stanford, CA, USA.

- <sup>25</sup>Department of Genetics, Stanford University School of Medicine; Stanford, CA, USA.
- <sup>26</sup>Department of Biology, Stanford University; Stanford, CA, USA.
- <sup>27</sup>Department of Pediatrics, Division of Cardiology, Stanford University School of Medicine; Stanford, CA, USA.
- <sup>28</sup>Stanford Diabetes Research Center, Stanford University School of Medicine, Stanford, California
- <sup>29</sup>Center for Gynecology and Reproductive Sciences, Department of Obstetrics, Gynecology and Reproductive Sciences, University of California San Francisco; San Francisco, CA, USA.
- <sup>30</sup>Department of Critical Care Medicine, The First Affiliated Hospital of Shantou University Medical College; Shantou, China.
- <sup>31</sup>Department of Ophthalmology, Stanford University School of Medicine; Stanford, CA, USA.
- <sup>32</sup>Division of Nephrology, Department of Medicine, University of California San Francisco; San Francisco, CA, USA.
- <sup>33</sup>Stanford University School of Medicine; Stanford, CA, USA.
- <sup>34</sup>Mass Spectrometry Platform, Chan Zuckerberg Biohub; Stanford, CA, USA.
- <sup>35</sup>Stanford Cancer Institute, Stanford University School of Medicine; Stanford, CA, USA.
- <sup>36</sup>Department of Medicine, Division of Hematology, Stanford University School of Medicine, Stanford, CA, USA
- <sup>37</sup>Department of Biochemistry and Biophysics, Cardiovascular Research Institute, University of California San Francisco; San Francisco, CA, USA.
- <sup>38</sup>Division of Hematology and Oncology, Department of Medicine, Bakar Computational Health Sciences Institute, Institute for Human Genetics, University of California San Francisco; San Francisco, CA, USA.
- <sup>39</sup>Stanford Cardiovascular Institute; Stanford CA, USA.
- <sup>40</sup>Department of Chemical Engineering, Stanford University; Stanford, CA, USA.
- <sup>41</sup>Department of Cell & Tissue Biology, University of California San Francisco; San Francisco, CA, USA.
- <sup>42</sup>Institute for Computational and Mathematical Engineering, Stanford University; Stanford, CA, USA.
- <sup>43</sup>Division of Infectious Diseases & Geographic Medicine, Department of Medicine, Stanford University School of Medicine; Stanford, CA, USA.
- <sup>44</sup>Department of Chemical and Systems Biology, Stanford University School of Medicine, Stanford, CA, USA
- <sup>45</sup>Division of Nephrology, Stanford University School of Medicine; Stanford, CA, USA.
- <sup>46</sup>Veterans Affairs Palo Alto Health Care System; Palo Alto, CA, USA.
- <sup>47</sup>Vera Moulton Wall Center for Pulmonary and Vascular Disease, Stanford University School of Medicine; Stanford, CA, USA.
- <sup>48</sup>Department of Urology, Stanford University School of Medicine, Stanford, CA, USA
- <sup>49</sup>Division of Hematology/Oncology, Department of Medicine, San Francisco Veterans Affairs Health Care System, San Francisco, CA, USA.
- <sup>50</sup>Department of Biochemistry, University of California San Francisco; San Francisco, CA, USA.

## References

1. The Tabula Sapiens Consortium & Quake, S. R. The Tabula Sapiens: a single cell transcriptomic atlas of multiple organs from individual human donors. *BioRxiv* (2021) doi:10.1101/2021.07.19.452956.
2. Kaufmann, P., Black, S. & Huppertz, B. Endovascular trophoblast invasion: implications for the pathogenesis of intrauterine growth retardation and preeclampsia. *Biol. Reprod.* **69**, 1–7 (2003).
3. Vento-Tormo, R. *et al.* Single-cell reconstruction of the early maternal-fetal interface in humans. *Nature* **563**, 347–353 (2018).
4. Tsang, J. C. H. *et al.* Integrative single-cell and cell-free plasma RNA transcriptomics elucidates placental cellular dynamics. *Proc Natl Acad Sci USA* **114**, E7786–E7795 (2017).
5. Suryawanshi, H. *et al.* A single-cell survey of the human first-trimester placenta and decidua. *Sci. Adv.* **4**, eaau4788 (2018).
6. Munchel, S. *et al.* Circulating transcripts in maternal blood reflect a molecular signature of early-onset preeclampsia. *Sci. Transl. Med.* **12**, (2020).
